# Supplementary material for: CT-guided percutaneous laser ablation of metastatic lung cancer: three cases report and literature review
Source: PubMed Central journal article supplement (PMC5356791; doi:10.18632/oncotarget.13901), 2016-12-10

# CT-guided percutaneous laser ablation of metastatic lung cancer: three cases report and literature review

## Supplementary Material

### Search strategy:

Pubmed (1950-present)

1. (lung OR pulmonary)
2. ("CT" OR "Computed Tomography")
3. (metastasis OR metastatic)
4. (neoplasm OR tumor OR tumour OR cancer OR oncolog\* OR carcinoma)
5. ("RFA" OR "radiofrequency ablation" OR "RF ablation" OR "radiofrequency thermal ablation" OR "RTA")
6. ("microwave ablation" OR "microwave thermal ablation" OR MWA)
7. (laser AND ablation)
8. 5 OR 6 OR 7
9. 1 AND 2 AND 3 AND 4 AND 8
10. "Ablation Techniques"[Mesh]
11. "Laser Therapy "[Mesh]
12. 10 OR 11
13. "Lung Neoplasms "[Mesh]
14. "Carcinoma, Non-Small-Cell Lung"[Mesh]
15. "Small Cell Lung Carcinoma"[Mesh]
16. 13 OR 14 OR 15
17. 12 AND 16
18. 9 OR 17 Sort by: PublicationDate Filters: published in the last 5 years

Embase(1980-present)

1. 'lung':ab,ti
2. 'pulmonary ':ab,ti
3. 1 OR 2
4. 'CT ':ab,ti
5. 'Computed Tomography ':ab,ti
6. 3 OR 4
7. 'metastasis':ab,ti
8. 'metastatic':ab,ti
9. 7 OR 8
10. 'microwave ablation ':ab,ti
11. 'microwave thermal ablation ':ab,ti
12. 'MWA ':ab,ti
13. 10 OR 11 OR 12
14. 'RFA ':ab,ti
15. 'radiofrequency ablation ':ab,ti

16. 'RF ablation':ab,ti
17. 'radiofrequency thermal ablation':ab,ti
18. 'RTA':ab,ti
19. 14 OR 15 OR 16 OR 17 OR 18
20. 'laser ablation':ab,ti
21. 'neoplas\*':ab,ti
22. 'cancer ':ab,ti
23. 'tumor ':ab,ti
24. 'tumour ':ab,ti
25. 'carcinoma ':ab,ti
26. 'oncolog\*':ab,ti
27. 21 OR 22 OR 23 OR 24 OR 25 OR 26
28. 13 OR 19 OR 20
29. 3 AND 6 AND 9 AND 27 AND 28 Sort by: PublicationDate Filters: published in the last 5 years

#### Scoups

1. TITLE-ABS-KEY ( "lung" )
2. TITLE-ABS-KEY ( "pulmonary" )
3. 1 OR 2
4. TITLE-ABS-KEY ( "RFA" )
5. TITLE-ABS-KEY ( "radiofrequency ablation" )
6. TITLE-ABS-KEY ( "RF ablation" )
7. TITLE-ABS-KEY ( "radiofrequency thermal ablation" )
8. TITLE-ABS-KEY ( "RTA" )
9. 4 OR 5 OR 6 OR 7 OR 8
10. TITLE-ABS-KEY ( "microwave ablation" )
11. TITLE-ABS-KEY ( "microwave thermal ablation " )
12. TITLE-ABS-KEY ( "MWA" )
13. 10 OR 11 OR 12
14. TITLE-ABS-KEY ( "laser ablation " )
15. 9 OR 13 OR 14
16. TITLE-ABS-KEY ( "neoplas\*" )
17. TITLE-ABS-KEY ( "cancer" )
18. TITLE-ABS-KEY ( "tumor" )
19. TITLE-ABS-KEY ( "tumour" )
20. TITLE-ABS-KEY ( "carcinoma" )
21. TITLE-ABS-KEY ( "oncolog\*" )
22. 16 OR 17 OR 18 OR 19 OR 20 OR 21
23. TITLE-ABS-KEY ( "CT" )
24. TITLE-ABS-KEY ( "Computed Tomography" )
25. 23 OR 24
26. TITLE-ABS-KEY ( "metastasis " )
27. TITLE-ABS-KEY ( "metastatic " )

28. 26 OR 27

29. 3 AND 9 AND 13 AND 15 AND 22 AND 25 AND 28 Sort by: PublicationDate Filters: published in the last 5 years

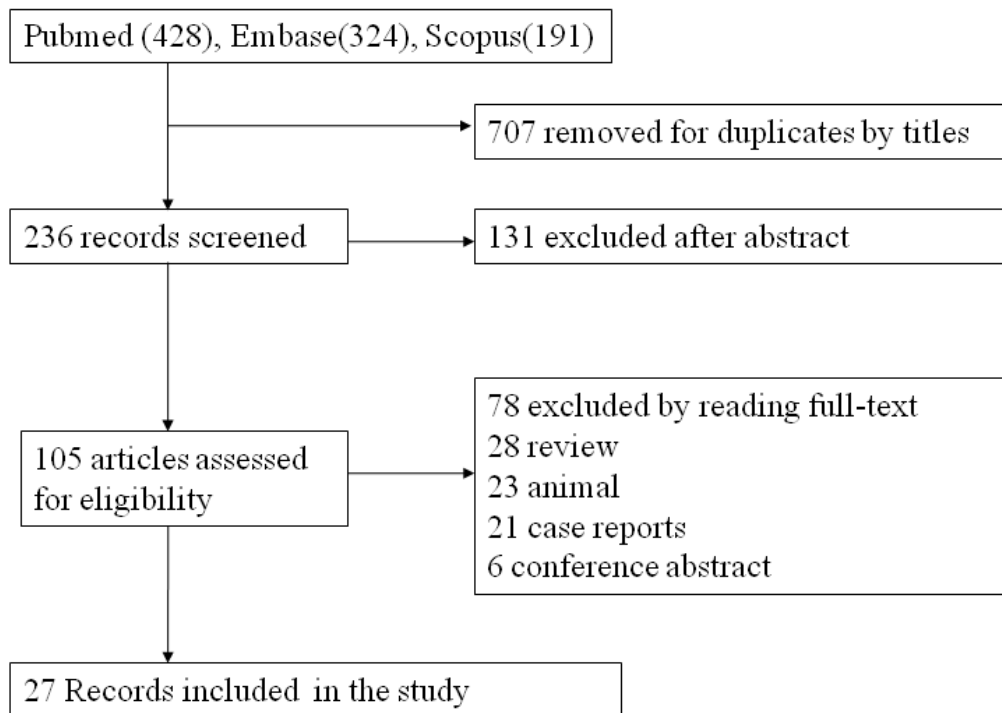

Supplement: oncotarget-08-2187-s001.pdf [file oncotarget-08-2187-s001.pdf]
